# Supplementary material for: Interventions to Improve Sexual Health in Women Living with and Surviving Cancer: Review and Recommendations
Source: MDPI journal article supplement (doi:10.3390/cancers13133153), 2021-06-24
Supplement: s1 [file s1]

# Supplementary Material: Interventions to Improve Sexual Health in Women Living with and Surviving Cancer: Review and Recommendations

Jenna Sopfe, Jessica Pettigrew, Anosheh Afghahi, Leslie C. Appiah and Helen L. Coons

Table S1. PubMed search strategy.

| Concepts                                           | Cancer/Survivors                                                                                                              | Survivors/Survivorship                                                                                                                                                                                                | Sexuality/Sexual Function/Sexual Health                                                                                                                                                                                                                                                                                                                                                                                                                                                                                                                                                                                                                                                                                                                                                                                                                                             |
|----------------------------------------------------|-------------------------------------------------------------------------------------------------------------------------------|-----------------------------------------------------------------------------------------------------------------------------------------------------------------------------------------------------------------------|-------------------------------------------------------------------------------------------------------------------------------------------------------------------------------------------------------------------------------------------------------------------------------------------------------------------------------------------------------------------------------------------------------------------------------------------------------------------------------------------------------------------------------------------------------------------------------------------------------------------------------------------------------------------------------------------------------------------------------------------------------------------------------------------------------------------------------------------------------------------------------------|
| Entry<br>Terms and<br>Keywords<br>(Title/Abstract) | Neoplasm[tiab] OR<br>Neoplasms[tiab] OR<br>Cancer[tiab] OR<br>Cancers[tiab] OR<br>Malignancy[tiab] OR<br>Malignancies[tiab]OR | Survivors[tiab] OR<br>Survivor[tiab] OR<br>Survivorship[tiab] OR<br>"cancersurvivor"[tiab] OR<br>"cancer survivors"[tiab] OR<br>"cancer survivorship" OR<br>"lateeffects"[tiab] OR<br>"long-term<br>outcomes"[tiab]OR | "sexual"[tiab] OR<br>"Sex Orientation"[tiab] OR<br>Sexuality[tiab] OR<br>Orgasms[tiab] OR<br>"SexDevelopment"[tiab] OR<br>"SexualDevelopment"[tiab] OR<br>"Psychological SexualDysfunction"[tiab] OR<br>"Psychological Sexual Dysfunctions"[tiab] OR<br>Psychosexual[tiab]OR<br>Psycho-sexual[tiab] OR<br>"OrgasmicDisorder"[tiab] OR<br>"Orgasmic Disorders"[tiab] OR<br>"Sexual Arousal Disorder"[tiab] OR<br>"Sexual Arousal Disorders"[tiab] OR<br>"Dyspareunia"[tiab] OR<br>"SexDisorders"[tiab] OR<br>Libido[tiab] OR<br>"Vaginalatrophy"[tiab] OR<br>"Gonadotoxicity"[tiab] OR<br>"Gonadal dysfunction"[tiab] OR<br>"vaginalstenosis"[tiab] OR<br>"Bodyimage"[tiab] OR<br>"BodyImages"[tiab] OR<br>"BodySchema"[tiab] OR<br>"BodySchemas"[tiab] OR<br>"SexualPartner"[tiab] OR<br>"SexualPartners"[tiab] OR<br>"romanticrelationships"[tiab] OR<br>"sexualintimacy"[tiab] OR |
|                                                    |                                                                                                                               |                                                                                                                                                                                                                       | "Sexual<br>Behavior"[Mesh]OR"Orgasm"[Mesh]OR<br>"Sexual Development"[Mesh]OR"Psychosexual<br>Development"[Mesh]OR<br>"Sexual Dysfunctions,<br>Psychological"[Mesh]OR"Sexual Dysfunction,<br>Physiological"[Mesh]OR"Libido"[Mesh]<br>OR"Body Image"[Mesh]<br>OR"Sexual Partners"[Mesh]                                                                                                                                                                                                                                                                                                                                                                                                                                                                                                                                                                                               |
|                                                    |                                                                                                                               |                                                                                                                                                                                                                       |                                                                                                                                                                                                                                                                                                                                                                                                                                                                                                                                                                                                                                                                                                                                                                                                                                                                                     |
|                                                    |                                                                                                                               |                                                                                                                                                                                                                       |                                                                                                                                                                                                                                                                                                                                                                                                                                                                                                                                                                                                                                                                                                                                                                                                                                                                                     |
|                                                    |                                                                                                                               |                                                                                                                                                                                                                       |                                                                                                                                                                                                                                                                                                                                                                                                                                                                                                                                                                                                                                                                                                                                                                                                                                                                                     |
|                                                    |                                                                                                                               |                                                                                                                                                                                                                       |                                                                                                                                                                                                                                                                                                                                                                                                                                                                                                                                                                                                                                                                                                                                                                                                                                                                                     |
|                                                    |                                                                                                                               |                                                                                                                                                                                                                       |                                                                                                                                                                                                                                                                                                                                                                                                                                                                                                                                                                                                                                                                                                                                                                                                                                                                                     |
|                                                    |                                                                                                                               |                                                                                                                                                                                                                       |                                                                                                                                                                                                                                                                                                                                                                                                                                                                                                                                                                                                                                                                                                                                                                                                                                                                                     |
|                                                    |                                                                                                                               |                                                                                                                                                                                                                       |                                                                                                                                                                                                                                                                                                                                                                                                                                                                                                                                                                                                                                                                                                                                                                                                                                                                                     |
|                                                    |                                                                                                                               |                                                                                                                                                                                                                       |                                                                                                                                                                                                                                                                                                                                                                                                                                                                                                                                                                                                                                                                                                                                                                                                                                                                                     |
| MeSH<br>(Medical<br>Subject<br>Headings)           | "Neoplasms"[Mesh]                                                                                                             | "Cancer Survivors"[Mesh]                                                                                                                                                                                              |                                                                                                                                                                                                                                                                                                                                                                                                                                                                                                                                                                                                                                                                                                                                                                                                                                                                                     |
